# Supplementary material for: Association of maternal pre-pregnancy body mass index with neonatal respiratory outcomes: A nationwide population-based cohort study
Source: Research Square preprint supplement (doi:10.21203/rs.3.rs-6888684/v1), 2025-08-01
Supplement: Supplementary file 1 [file a8d8c4d6c3084988be2dc2d5.docx]

**Supplementary Table 1. Diagnostic codes of variables and outcomes analyzed in this study**

| Variables/Outcomes | Diagnostic codes |
| --- | --- |
| Maternal diseases |  |
| Chronic hypertension | I10-I15, O10 |
| Pregnancy-induced hypertension | O12-O15 |
| Pre-gestational diabetes mellitus | O24.0-O24.3, E10.0-E10.9, E11.0-E11.9, E12.0-E12.9, E13.0-E13.9, E14.0-E14.9 |
| Gestational diabetes mellitus | O24.4, O24.9 |
| Delivery modes |  |
| Vaginal delivery | O80.0-O80.9 |
| Cesarean section | O82.0-O82.9 |
| Neonatal characteristics |  |
| Small-for-gestational age | P05.0, P05.1, P05.9 |
| NICU admission | AJ101, AJ111, AJ121, AJ131, AJ144, AJ161, AJ201, AJ211, AJ221, AJ231, AJ244, AJ261, AJ301, AJ311, AJ321, AJ331, AJ351, AJ051-AJ054 |
| Neonatal outcomes |  |
| Ventilator care | M085, M086, M585, M586 |
| Oxygen use | M0040 |
| Respiratory distress syndrome | P220, P220-001 |
| Respiratory distress | P228, P229, P229-001 |
| Transient tachypnea of newborn | P221, P221-001 |
| Bronchopulmonary dysplasia (all) | P2710, P2711, P2712, P2719 |
| Moderate to severe bronchopulmonary dysplasia | P2711, P2712 |
